# Supplementary material for: Improving coeliac disease risk prediction by testing non-HLA variants additional to HLA variants
Source: PubMed Central journal article supplement — Gut. 2013 May 23;63(3):415–22. doi: 10.1136/gutjnl-2012-304110 (PMC3933173; doi:10.1136/gutjnl-2012-304110), 2013-05-23
Supplement: gutjnl-2012-304110-s1.pdf [file gutjnl-2012-304110-s1.pdf]

## **Appendix**

The PreventCD study group

Belgium: Association of European Celiac Societies (AOECS): C Scerri, T Koltai;  
Croatia: University Children's Hospital Zagreb: S Kolaček, Z Mišak, S Abdović;  
Germany: Hauner Children's Hospital, University of Munich Medical Centre,  
Munich, Germany: S Koletzko, G Osiander, K Werkstetter; Phadia GmbH: E  
Mummert; Hungary: Celiac Disease Centre of Heim Pál Children's Hospital: IR  
Korponay-Szabo, J Gyimesi; Israel: M Berant Rambam Health Care Campus, Haifa,  
Israel; Schneider Children's Medical Centre, Sackler Faculty of Medicine, Tel-Aviv  
University: R Shamir, C Hartman; Italy: Eurospital SpA: E Bravi, M Poles; European  
Laboratory for the Investigation of Food-Induced Diseases (ELFID), University  
Federico II: R Auricchio, G Limongelli, L Greco, R Troncone; Spedali Civili,  
Brescia: V Villanacci; The Netherlands: Danone Research BV: JG Bindels; Leiden  
University Medical Centre: R Brand, B Funke Kupper, CE Hogen Esch, EG Hopman,  
F Koning, EMC Kooy-Winkelaar, MC te Marvelde, H Putter, E Stoopman; Norway:  
University of Oslo: LM Sollid, M Ráki; Poland: The Medical University of Warsaw:  
A Chmielewska, P Dziechciarz, M Piescik, H Szajewska; Department and Clinic of  
Pediatrics, Allergology and Gastroenterology, Medical University: A. Szaflarska-  
Szczepanik; Spain: Hospital Universitari de Sant Joan de Reus/Universitat Rovira i  
Virgili: G Castillejo, J Escribano, A Josa, Instituto de Biomedicina de Valencia  
(CSIC): A Capilla and Hospital Sant Joan de Deu Barcelona: V Varea; La Fe  
University Hospital: C Ribes-Koninckx, A Lopez, P Crespo; La Paz University  
Hospital: E Martinez, I Polanco; Sweden: Linköping University: L Högberg, L  
Stenhammar; Lund University: A Carlsson, C Webb; Norrtälje Hospital: S  
Hammarroth; Umeå University: O Hernell, C Lagerqvist, A Myléus, K Nordyke, F

Norström, O Sandström, S Wall; Växjö Hospital: E. Karlsson.
