# Supplementary material for: Improving coeliac disease risk prediction by testing non-HLA variants additional to HLA variants
Source: PubMed Central journal article supplement — Gut. 2013 May 23;63(3):415–22. doi: 10.1136/gutjnl-2012-304110 (PMC3933173; doi:10.1136/gutjnl-2012-304110), 2013-05-23
Supplement: gutjnl-2012-304110-s3.pdf [file gutjnl-2012-304110-s3.pdf]

**Supplementary Table 1.** SNPs and weights used for the three different genetic risk models: GRS\_10, GRS\_26 and GRS\_57.

| Locus                             | Chr. | GRS_10     |             |                        | GRS_26     |             |                        | GRS_57                         |             |                        |
|-----------------------------------|------|------------|-------------|------------------------|------------|-------------|------------------------|--------------------------------|-------------|------------------------|
|                                   |      | SNP        | Risk allele | $\beta=\ln(\text{OR})$ | SNP        | Risk allele | $\beta=\ln(\text{OR})$ | SNP                            | Risk allele | $\beta=\ln(\text{OR})$ |
| <i>C1orf93, TNFRSF14, MMEL1</i>   | 1    |            |             |                        | rs3748816  | A           | 0.06217                | rs4445406                      | T           | 0.07356                |
| <i>RUNX3</i>                      | 1    |            |             |                        | rs10903122 | G           | 0.08316                | rs72657048                     | G           | 0.087                  |
| <i>FASLG</i>                      | 1    |            |             |                        |            |             |                        | rs12068671                     | T           | 0.1605                 |
|                                   |      |            |             |                        |            |             |                        | rs859637                       | T           | 0.1825                 |
| <i>RGS1</i>                       | 1    | rs2816316  | A           | 0.2142                 | rs2816316  | A           | 0.2142                 | <b>rs72734930<sup>##</sup></b> | A           | 0.3622                 |
|                                   |      |            |             |                        |            |             |                        | rs1359062                      | G           | 0.206                  |
| <i>KIF21B, C1orf106</i>           | 1    |            |             |                        | rs296547   | C           | 0.1103                 | rs10800746                     | C           | 0.1155                 |
| <i>PUS10</i>                      | 2    |            |             |                        | rs13003464 | G           | 0.09383                | rs13003464                     | G           | 0.09383                |
| <i>PLEK, FBX048</i>               | 2    |            |             |                        | rs17035378 | T           | 0.09479                | rs10167650                     | T           | 0.1098                 |
| <i>IL18RAP, IL18R1</i>            | 2    | rs917997   | G           | 0.2253                 | rs917997   | G           | 0.2253                 | rs990171                       | A           | 0.2231                 |
| <i>ITGA4, UBE2E3</i>              | 2    |            |             |                        | rs4667121  | C           | 0.05532                | rs1018326                      | C           | 0.09917                |
| <i>STAT4</i>                      | 2    |            |             |                        |            |             |                        | <b>rs6715106<sup>#</sup></b>   | A           | 0.3624                 |
|                                   |      |            |             |                        |            |             |                        | rs12998748                     | G           | 0.1372                 |
|                                   |      |            |             |                        |            |             |                        | rs6752770                      | G           | 0.06202                |
| <i>CTLA4, ICOS, CD28</i>          | 2    |            |             |                        | rs4675374  | T           | 0.1544                 | <b>rs10207814<sup>##</sup></b> | T           | 0.1509                 |
|                                   |      |            |             |                        |            |             |                        | rs1980422                      | C           | 0.1568                 |
|                                   |      |            |             |                        |            |             |                        | rs34037980                     | A           | 0.05851                |
| <i>CCR4, GLB1</i>                 | 3    |            |             |                        | rs13314993 | G           | 0.1289                 | rs4678523                      | C           | 0.1435                 |
| <i>CCR1-3, LTF</i>                | 3    | rs6441961  | T           | 0.1255                 | rs13098911 | T           | 0.1845                 | rs7616215                      | C           | 0.1031                 |
|                                   |      |            |             |                        |            |             |                        | rs2097282                      | C           | 0.1299                 |
|                                   |      |            |             |                        |            |             |                        | <b>rs60215663<sup>#</sup></b>  | A           | 0.2788                 |
| <i>ARHGAP1</i>                    | 3    |            |             |                        | rs11712165 | G           | 0.03233                | rs61579022                     | A           | 0.03245                |
| <i>SCHIP1, IL12A</i>              | 3    | rs9811792  | C           | 0.1556                 |            |             |                        | rs1353248                      | C           | 0.1579                 |
|                                   |      | rs17810546 | G           | 0.2642                 | rs17810546 | G           | 0.2642                 | imm_3_161120372                | A           | 0.2937                 |
|                                   |      |            |             |                        |            |             |                        | rs2561288                      | T           | 0.1773                 |
| <i>LPP</i>                        | 3    | rs1464510  | A           | 0.1794                 | rs1464510  | A           | 0.1794                 | rs2030519                      | A           | 0.2107                 |
| <i>KIAA1109, ADAD1, IL2, IL21</i> | 4    |            |             |                        |            |             |                        | <b>rs62323881<sup>#</sup></b>  | A           | 0.2048                 |
|                                   |      | rs6822844  | G           | 0.3911                 | rs13151961 | A           | 0.3658                 | rs13132308                     | A           | 0.3895                 |

**Supplementary Table 1 (continued):** SNPs and weights used for the three different genetic risk models: GRS\_10, GRS\_26 and GRS\_57

| Locus                        | Chr. | GRS_10    |             |                        | GRS_26     |             |                        | GRS_57                              |             |                        |
|------------------------------|------|-----------|-------------|------------------------|------------|-------------|------------------------|-------------------------------------|-------------|------------------------|
|                              |      | SNP       | Risk allele | $\beta=\ln(\text{OR})$ | SNP        | Risk allele | $\beta=\ln(\text{OR})$ | SNP                                 | Risk allele | $\beta=\ln(\text{OR})$ |
| <i>IRF4</i>                  | 6    |           |             |                        |            |             |                        | rs12203592                          | C           | 0.1242                 |
|                              |      |           |             |                        |            |             |                        | rs1050976                           | C           | 0.09018                |
| <i>BACH2</i>                 | 6    |           |             |                        | rs10806425 | A           | 0.1215                 | rs7753008                           | C           | 0.1386                 |
| <i>PTPRK</i>                 | 6    |           |             |                        | rs802734   | G           | 0.1338                 | rs55743914                          | T           | 0.1858                 |
|                              |      |           |             |                        |            |             |                        | rs72975916                          | C           | 0.2027                 |
| <i>TNFAIP3, OLIG3</i>        | 6    | rs2327832 | G           | 0.2037                 | rs2327832  | G           | 0.2037                 | imm_6_138043754                     | G           | 0.1317                 |
|                              |      |           |             |                        |            |             |                        | rs17264332                          | G           | 0.2298                 |
| <i>TAGAP</i>                 | 6    | rs1738074 | T           | 0.1545                 | rs1738074  | T           | 0.1545                 | rs182429                            | A           | 0.1566                 |
|                              |      |           |             |                        |            |             |                        | <b>rs1107943<sup>#</sup></b>        | C           | 0.1342                 |
| <i>ELMO1</i>                 | 7    |           |             |                        |            |             |                        | 1kg_7_37384979                      | G           | 0.1715                 |
| <i>PVT1</i>                  | 8    |           |             |                        | rs9792269  | A           | 0.08532                | rs10808568                          | A           | 0.08465                |
| <i>PFKFB3, PRKCQ</i>         | 10   |           |             |                        |            |             |                        | rs2387397                           | C           | 0.08623                |
| <i>ZMIZ1</i>                 | 10   |           |             |                        | rs1250552  | A           | 0.1472                 | rs1250552                           | A           | 0.1472                 |
| <i>POU2AF1, C11orf93</i>     | 11   |           |             |                        |            |             |                        | rs7104791                           | T           | 0.1471                 |
| <i>TREH, DDX6</i>            | 11   |           |             |                        |            |             |                        | rs10892258                          | G           | 0.1234                 |
| <i>ETS1</i>                  | 11   |           |             |                        | rs11221332 | T           | 0.1378                 | rs61907765                          | T           | 0.1415                 |
| <i>SH2B3, ATXN2</i>          | 12   | rs3184504 | T           | 0.1516                 | rs3184504  | T           | 0.1516                 | rs3184504                           | T           | 0.1516                 |
| <i>ZFP36L1, C14orf181</i>    | 14   |           |             |                        |            |             |                        | rs11851414                          | C           | 0.1599                 |
| <i>CLK3, CSK</i>             | 15   |           |             |                        |            |             |                        | rs1378938                           | A           | 0.1226                 |
| <i>CIITA</i>                 | 16   |           |             |                        |            |             |                        | rs6498114                           | G           | 0.1431                 |
| <i>SOCS1, PRM1, PRM2</i>     | 16   |           |             |                        | rs12928822 | C           | 0.1128                 | rs243323                            | A           | 0.1001                 |
|                              |      |           |             |                        |            |             |                        | <b>imm_16_11281298<sup>##</sup></b> | G           | 0.002075               |
|                              |      |           |             |                        |            |             |                        | rs9673543                           | G           | 0.003185               |
| <i>PTPN2</i>                 | 18   |           |             |                        | rs1893217  | G           | 0.2063                 | rs11875687                          | C           | 0.1934                 |
|                              |      |           |             |                        |            |             |                        | <b>rs62097857<sup>##</sup></b>      | A           | 0.1095                 |
| <i>UBASH3A</i>               | 21   |           |             |                        |            |             |                        | rs1893592                           | A           | 0.07879                |
| <i>ICOSLG</i>                | 21   |           |             |                        | rs4819388  | C           | 0.1541                 | rs58911644                          | A           | 0.118                  |
| <i>UBE2L3, YDJC</i>          | 22   |           |             |                        |            |             |                        | rs4821124                           | C           | 0.1328                 |
| <i>HCFC1, TMEM187, IRAK1</i> | X    |           |             |                        |            |             |                        | rs13397                             | A           | 0.08922                |

Chr. chromosome; SNP single nucleotide polymorphism; OR odds ratio. The genes mentioned are the most plausible genes reported. <sup>#</sup> SNPs with MAF = 5-10%,  
<sup>##</sup> SNPs with MAF <5%.
