# Supplementary material for: Improving coeliac disease risk prediction by testing non-HLA variants additional to HLA variants
Source: PubMed Central journal article supplement — Gut. 2013 May 23;63(3):415–22. doi: 10.1136/gutjnl-2012-304110 (PMC3933173; doi:10.1136/gutjnl-2012-304110), 2013-05-23
Supplement: gutjnl-2012-304110-s4.pdf [file gutjnl-2012-304110-s4.pdf]

**Supplementary Table 2.** Odds ratio calculated from a logistic regression for models with HLA only and HLA+GRS\_26 using the derivation set.

| Parameters            | Model HLA only       | Model HLA+GRS_26     |
|-----------------------|----------------------|----------------------|
|                       | OR (95% CI)          | OR (95% CI)          |
| (Intercept)           | 0.04 (0.03-0.05)     | 0.03 (0.03-0.05)     |
| Male                  | 1                    | 1                    |
| Female                | 1.69 (1.48-1.93)     | 1.71 (1.49-1.96)     |
| UK                    | 1                    | 1                    |
| Italy                 | 2.11 (1.77-2.51)     | 1.96 (1.64-2.35)     |
| Netherlands           | 1.52 (1.27-1.83)     | 1.52 (1.26-1.83)     |
| Poland                | 1.96 (1.53-2.50)     | 1.88 (1.46-2.42)     |
| Spain1_Basque         | 1.91 (1.47-2.48)     | 1.96 (1.50-2.55)     |
| Spain2_Madrid         | 2.37 (1.83-3.07)     | 2.343 (1.80-3.05)    |
| Low HLA               | 1                    | 1                    |
| Intermediate HLA      | 13.92 (11.31-17.13)  | 14.07 (11.40-17.37)  |
| High HLA              | 89.12 (68.18-116.48) | 91.34 (69.56-119.94) |
| p0-p20 (Quintile 1)   | NA                   | 0.44 (0.35-0.55)     |
| p20-p40 (Quintile 2)  | NA                   | 0.91 (0.74-1.13)     |
| p40-p60 (Quintile 3)  | NA                   | 1                    |
| p60-p80 (Quintile 4)  | NA                   | 1.30 (1.06-1.59)     |
| p80-p100 (Quintile 5) | NA                   | 2.00 (1.65-2.43)     |

OR of 1 indicates the reference group. OR odds ratio; CI confidence interval; NA not applicable.
